# Supplementary material for: Hydrophobic asymmetric ultrafiltration PVDF membranes: an alternative separator for VFB with excellent stability
Source: Royal Society of Chemistry journal article supplement (doi:10.1039/c2cp43761a), 2012-11-17
Supplement: c2cp43761a.pdf [file c2cp43761a.pdf]

## Supporting information

### **Hydrophobic asymmetry ultrafiltration PVDF membranes: an alternative prospective separator for VFB with excellent stability**

Wenping Wei<sup>a,b</sup>, Huamin Zhang<sup>a,\*</sup>, Xianfeng Li<sup>a,\*\*</sup>, Zhensheng Mai<sup>a,b</sup>, Hongzhang Zhang<sup>a,b</sup>, Yun Li<sup>a,b</sup> and Ivo Vankelecom<sup>c</sup>

<sup>a</sup> Division of energy storage, Dalian Institute of Chemical Physics, Chinese Academy of Sciences, Dalian 116023, P.R. China

Email: zhanghm@dicp.ac.cn; lixianfeng@dicp.ac.cn

<sup>b</sup> Graduate University of the Chinese Academy of Sciences, Beijing 100039, P.R. China

<sup>c</sup>Centre for Surface Chemistry and Catalysis, Faculty of Bioscience Engineering, Katholieke Universiteit Leuven (K.U.Leuven), Kasteelpark Arenberg 23 – Box 2461, B-3001 Leuven, Belgium.

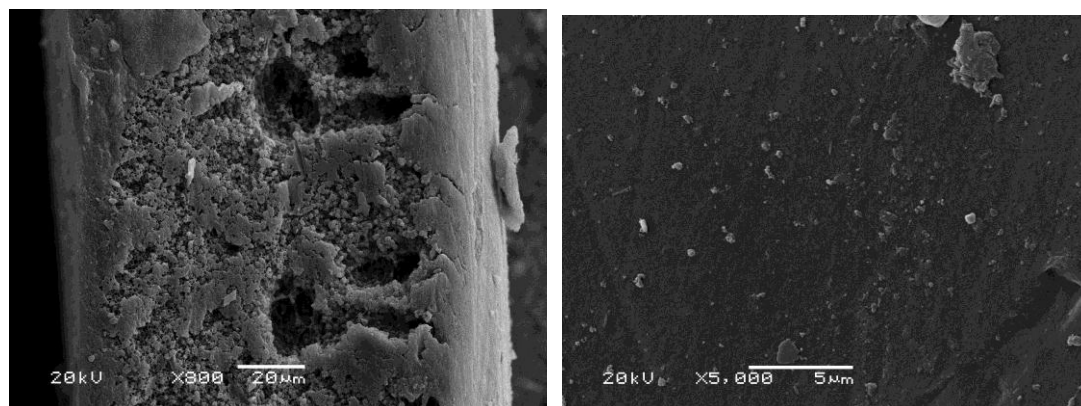

**Fig. 1S** Morphology of M-23-125 after 1000 cycles test

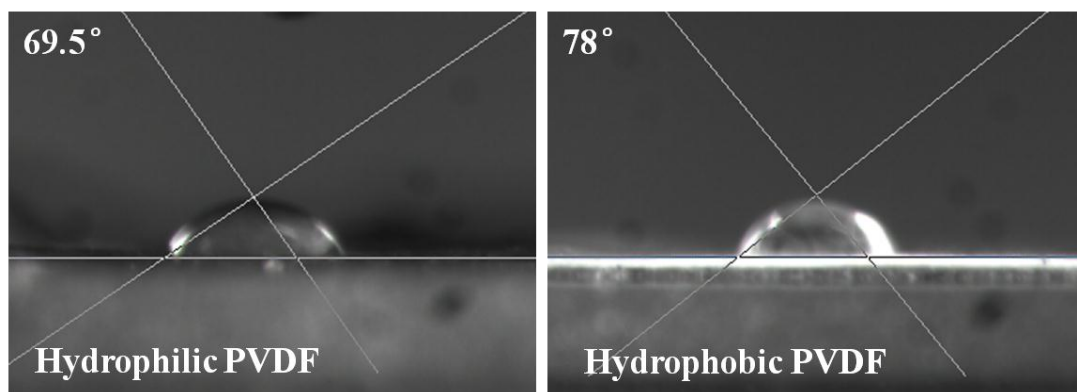

**Fig. 2S** Water contact angle of PVDF before and after hydrophilic treatment.

**Table 1S** Permeability of hydrophilic PVDF membranes

| membrane  | Proton permeability( $10^{-7}$ ) | Vanadium permeability( $10^{-7}$ ) |
|-----------|----------------------------------|------------------------------------|
| M-23-125  | 97.5                             | 7.9                                |
| HM-23-125 | 198.6                            | 19.2                               |

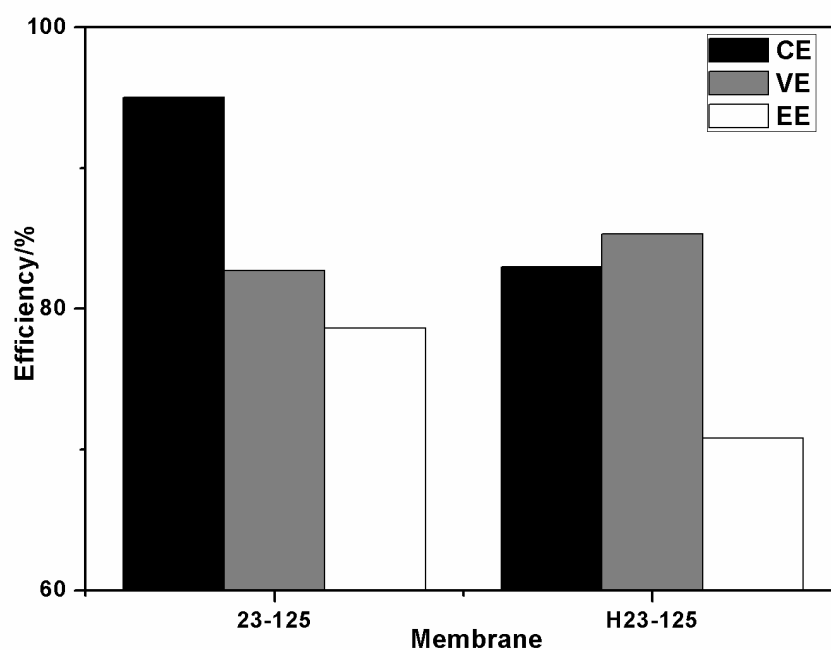

**Fig. 3S** Single cell performance of hydrophilic PVDF membranes.
